# Supplementary material for: Isospecific propylene polymerization with in situ generated bis(phenoxy-amine)zirconium and hafnium single site catalysts
Source: Royal Society of Chemistry journal article supplement (doi:10.1039/c3dt00058c), 2013-01-01
Supplement: c3dt00058c.pdf [file c3dt00058c.pdf]

## Supporting Information

### ***Synthesis of Telechelic Olefin Polymers via Catalytic Chain Growth on Multinuclear Alkylene Zinc Compounds***

Haruyuki Makio, Takashi Ochiai, Jun-ichi Mohri, Kouji Takeda, Toshiyuki Shimazaki, Yoko Usui, and Terunori Fujita

Mitsui Chemicals Singapore R&D Centre, 50 Science Park Road, Kendall, Science Park II Singapore 117406

Fax: (65) 6778-0843

E-mail: Haruyuki.Makio@mitsui-chem.co.jp or Terunori.Fujita@mitsui-chem.co.jp

#### **Determination of the degree of imine reduction with FI catalysts**

Complex **5**: 89%

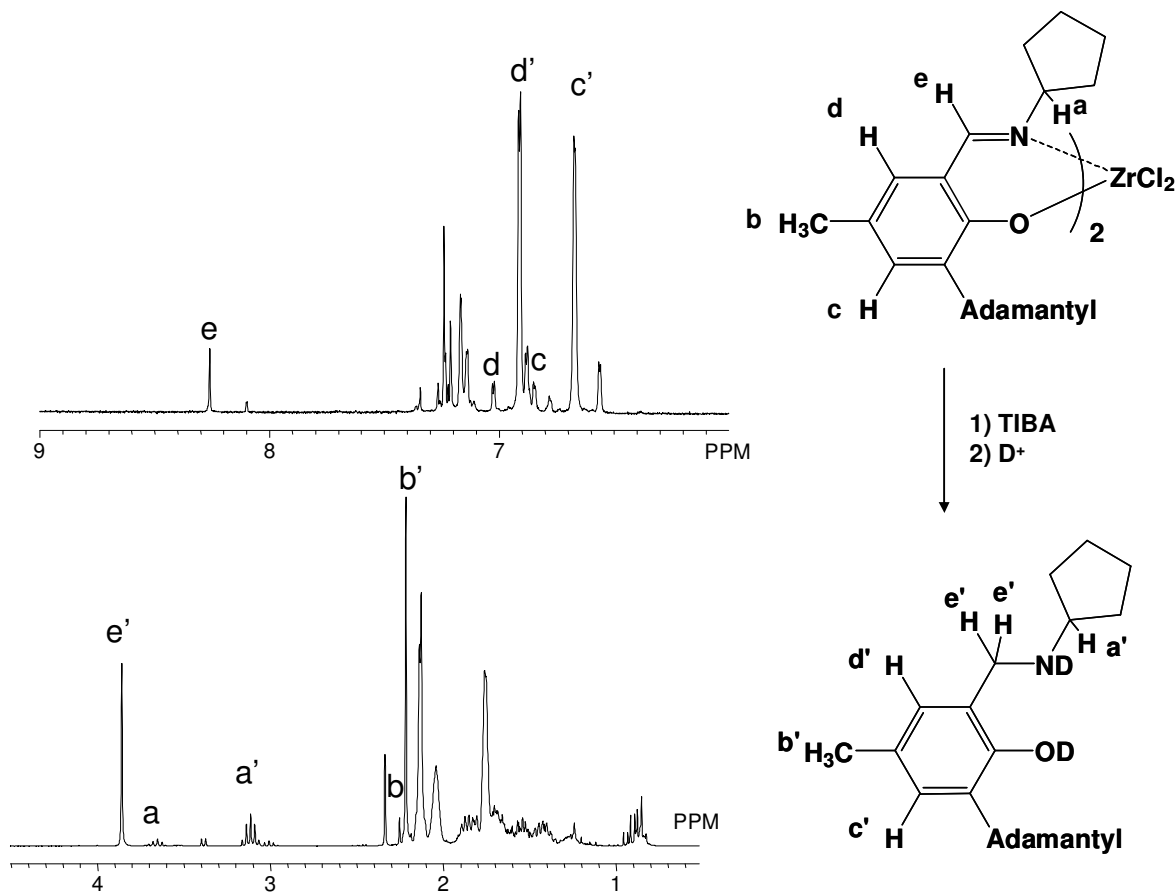

Complex 18: 69%

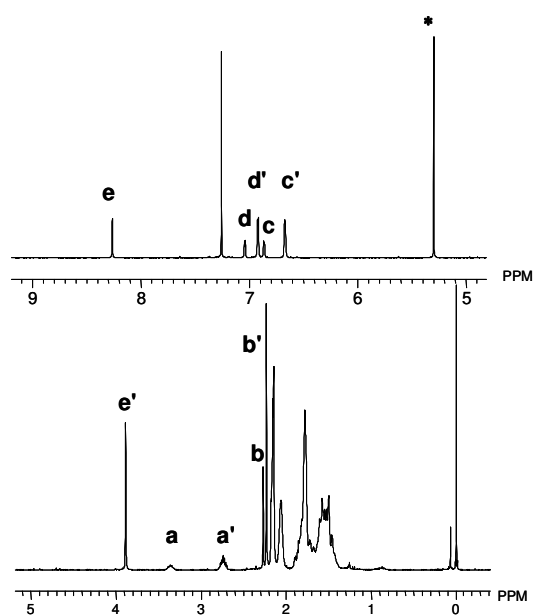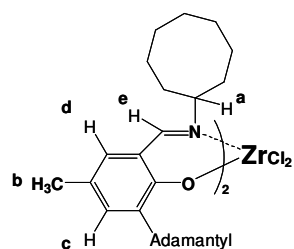

1) TIBA

2) D<sup>+</sup>

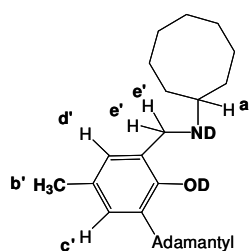

Complex 19: 82%

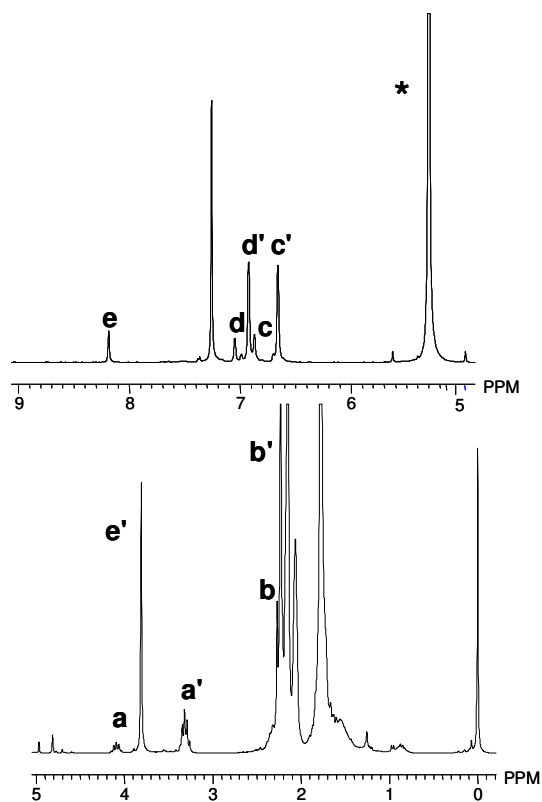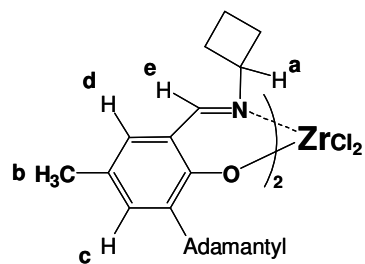

1) TIBA

2) D<sup>+</sup>

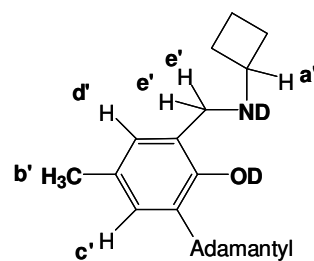

Complex 4: 67%

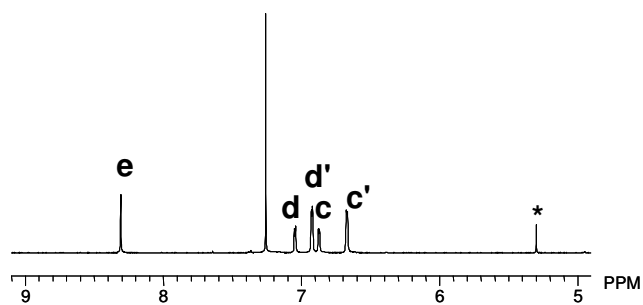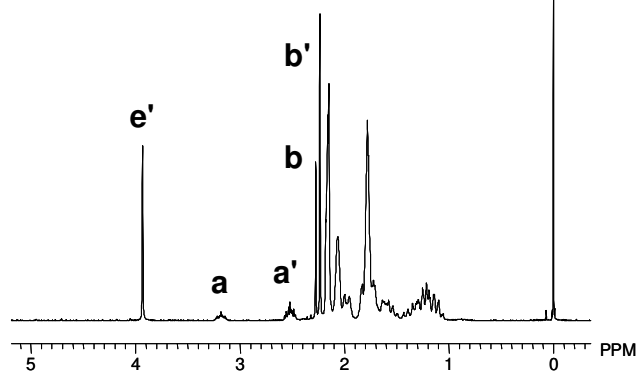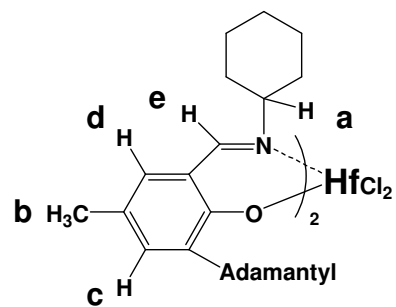

1) TIBA  
2) D<sup>+</sup>

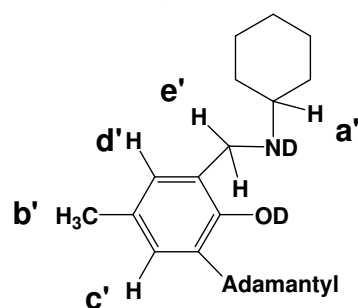

Complex 6: 89%

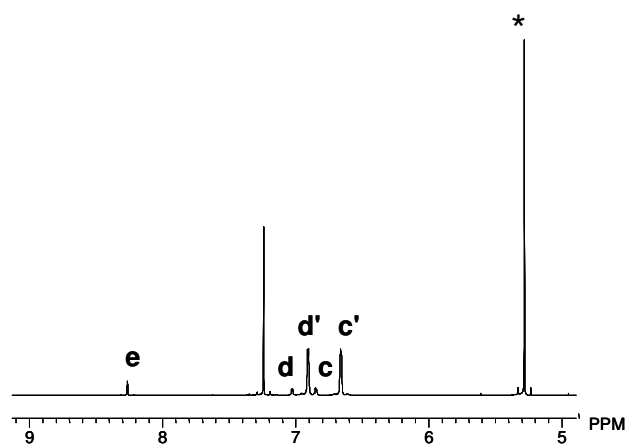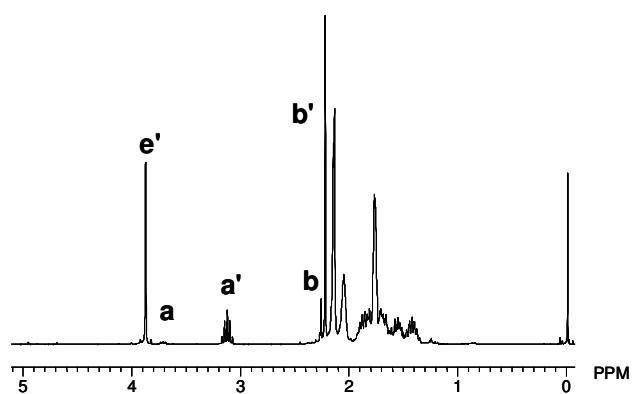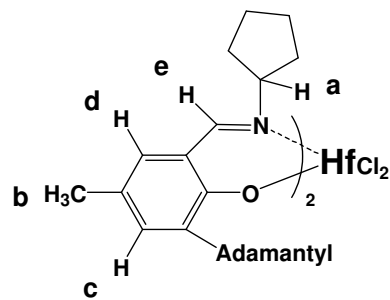

1) TIBA  
2) D<sup>+</sup>

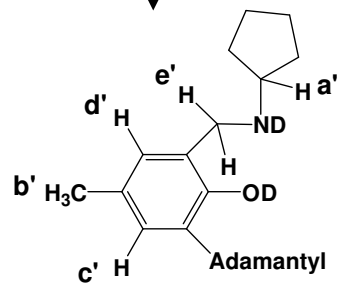

Complex 3 (Al/Zr = 60): 75%

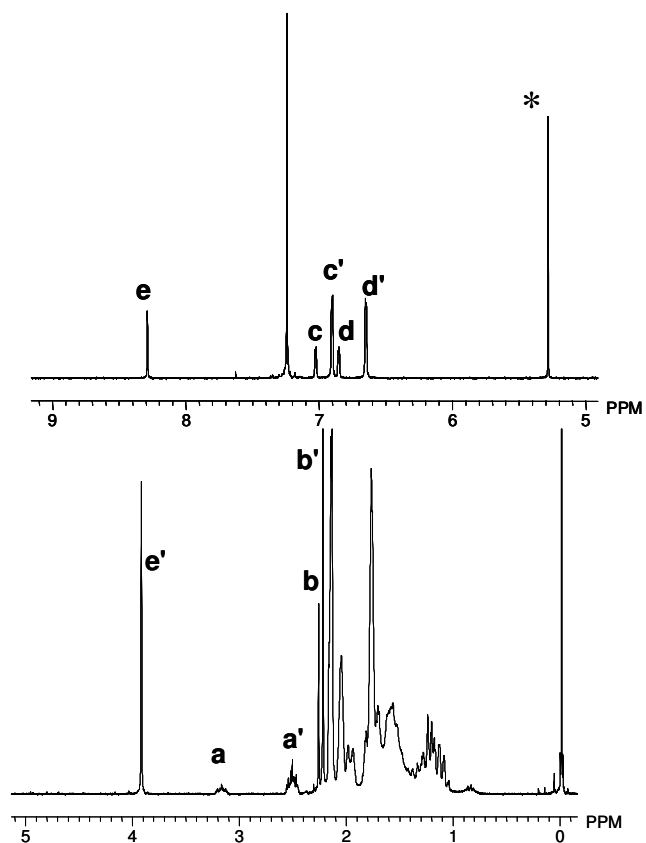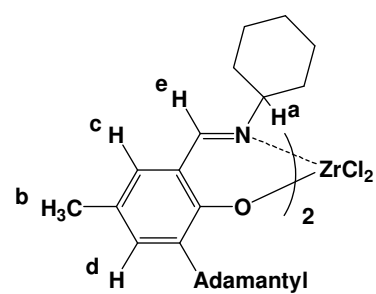

**Al/Zr = 60**

1) TIBA  
2) D<sup>+</sup>

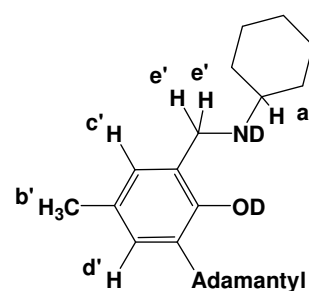

Complex 3 (40 °): 90%

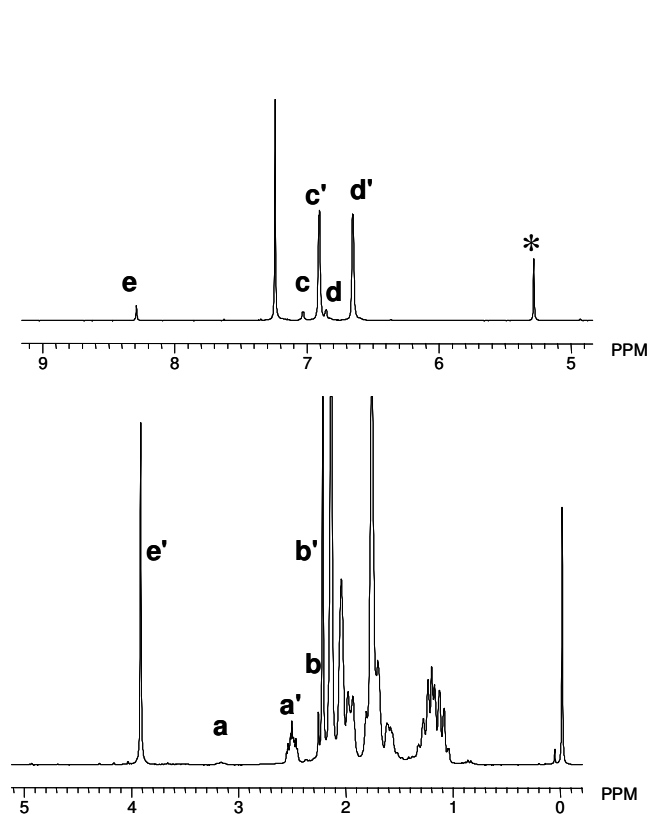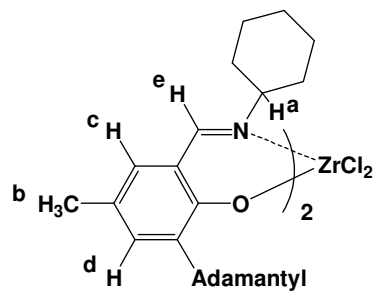

**40 °C**

1) TIBA  
2) D<sup>+</sup>

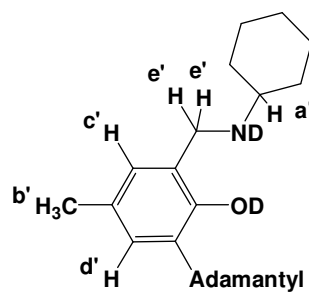

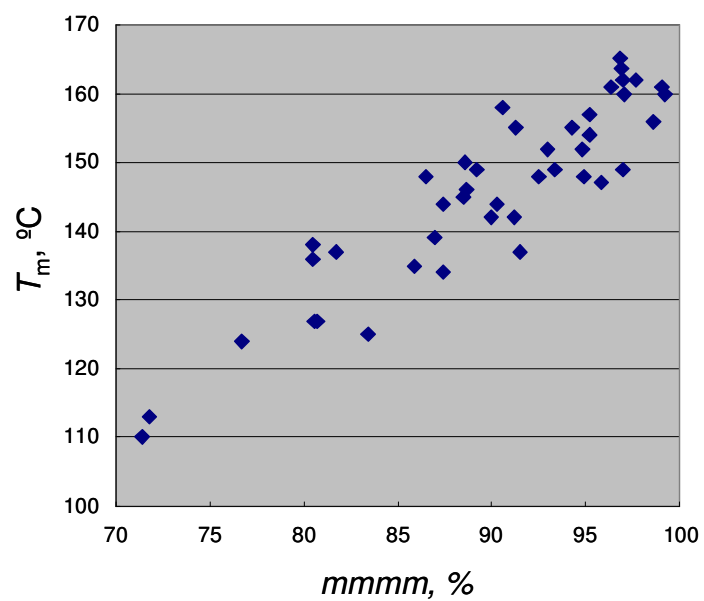

A relationship between  $T_m$  and  $mmmm$  for isotactic PP (data points were taken from ref. 5 and 10).
